# Supplementary material for: Use of radio-tagging to map spatial organization and social interactions in insects
Source: Oxford University Press journal article supplement (doi:10.1242/jeb.050526), 2010-12-08

Supplemental Figure S1: Multiple detections (indicated by stars) of a motionless ant in the nest (a) and of a mobile ant in the foraging area (b) during one scan. The positions of ants obtained using the algorithm are indicated by filled circles.

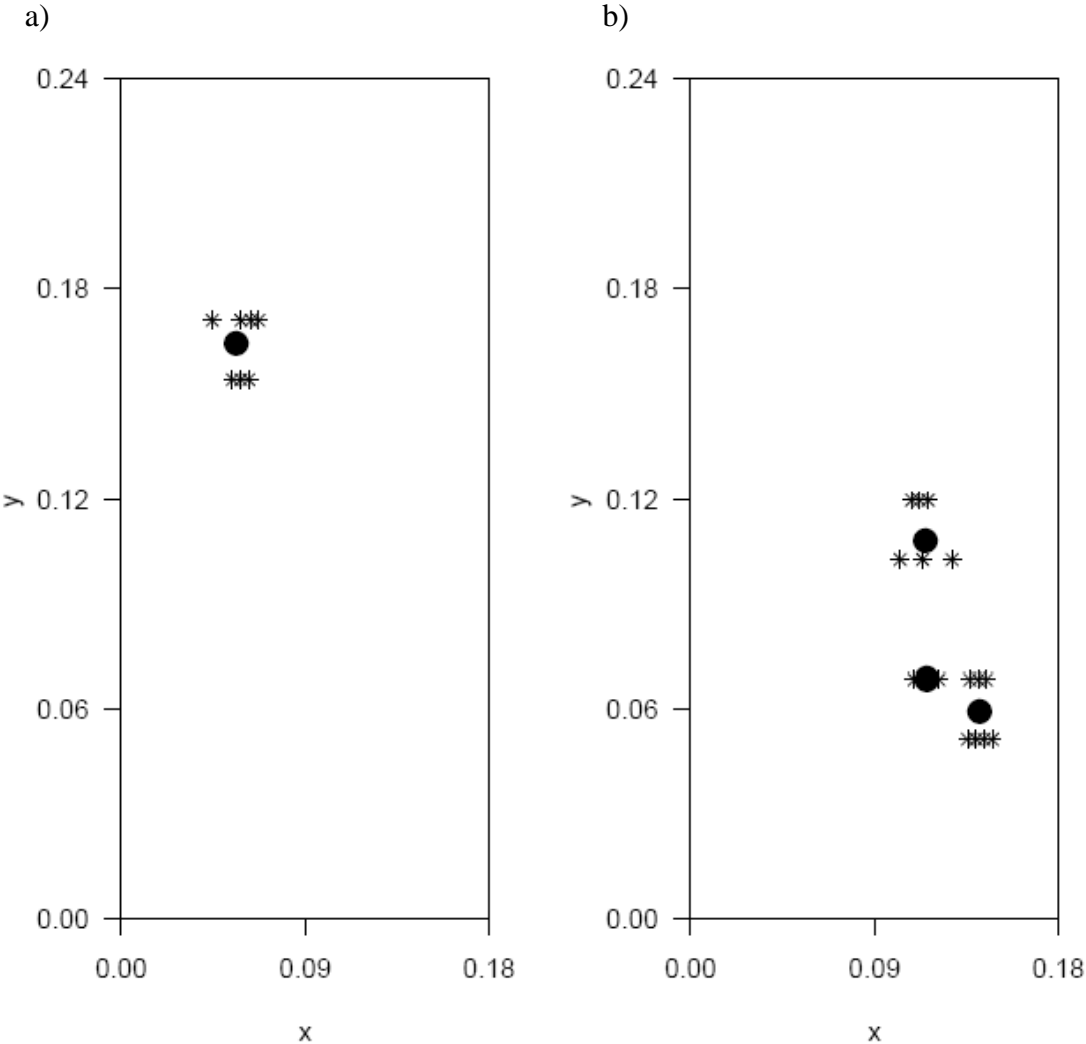

Supplement: jeb050526-sup-dev050526figs1.pdf [file jeb050526-sup-dev050526figs1.pdf]
