# Supplementary material for: Use of radio-tagging to map spatial organization and social interactions in insects
Source: Oxford University Press journal article supplement (doi:10.1242/jeb.050526), 2010-12-08

Supplemental Figure S2: Experimental frequency of the number of discrete positions (circles) and average maximal distance (squares) between multiple positions.

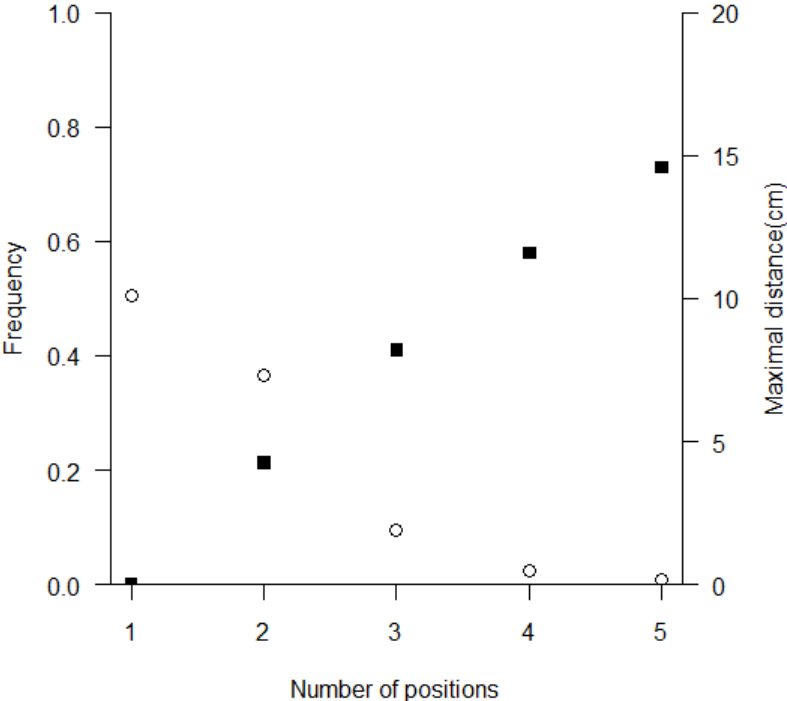

Supplement: jeb050526-sup-dev050526figs2.pdf [file jeb050526-sup-dev050526figs2.pdf]
